# Supplementary material for: Comparison of Target Recognition by TRAF1 and TRAF2
Source: PubMed Central journal article supplement (PMC7215387; doi:10.3390/ijms21082895), 2020-04-21
Supplement: ijms-21-02895-s001.pdf [file ijms-21-02895-s001.pdf]

## Supplementary Material

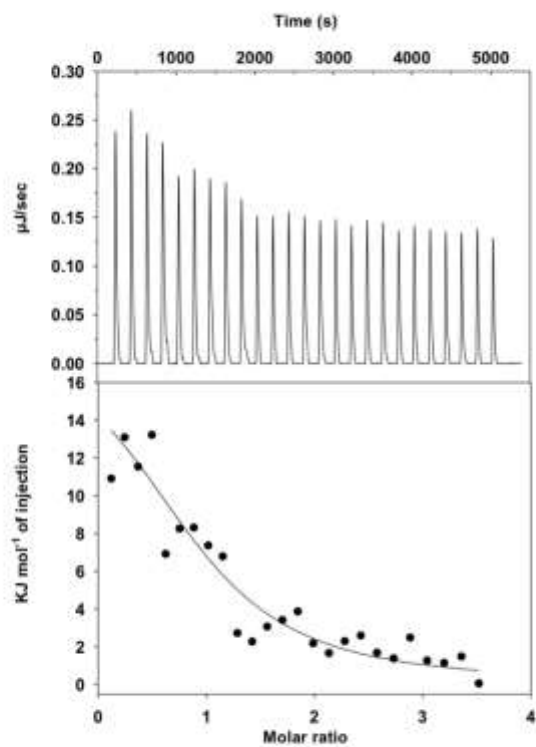

**Supplementary Figure 1.** Quantitative interaction analyses of TRADD on TRAF2 S454A mutant.

**a**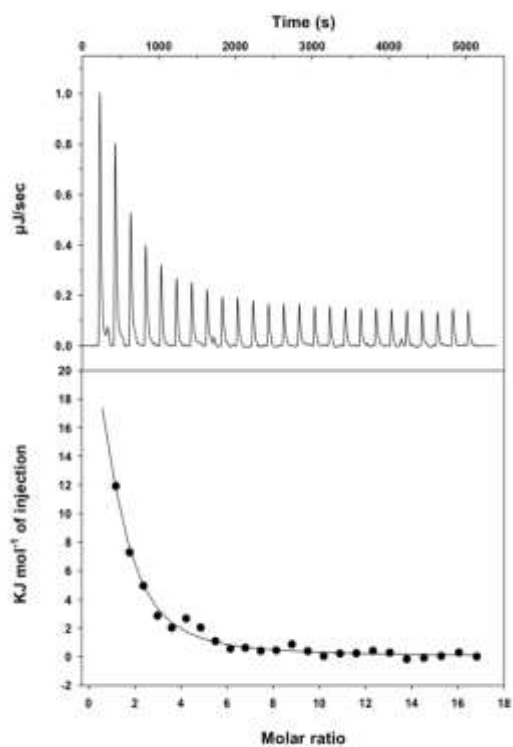**b**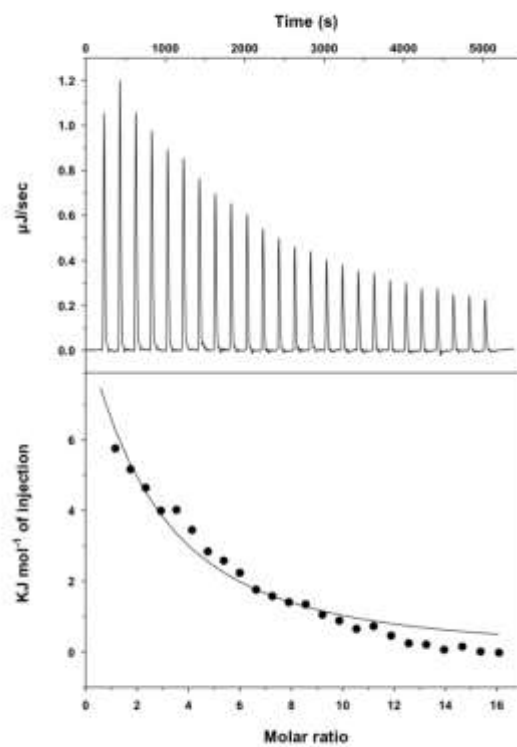

**Supplementary Figure 2.** Quantitative interaction analyses of TANK and caspase-2 on TRAF1 F357L mutant.
